# Supplementary material for: Pioneer cells established by the [SWI+] prion can promote dispersal and out-crossing in yeast
Source: PLoS Biol. 2017 Nov 14;15(11):e2003476. doi: 10.1371/journal.pbio.2003476 (PMC5685480; doi:10.1371/journal.pbio.2003476)
Supplement: S1 Table — Each yeast strain used in the study is listed along with its Swi1 prion status, transformed plasmids, and genotype. (XLSX) [file pbio.2003476.s004.xlsx]

## Sheet: Sheet1
S1 Table. Yeast strains used in this study
Strain	Plasmids transformed	Swi1 Prion State	Parent	Genotype	Purpose	Reference
BY4741		-		MATa, his3d1, leu2Δ, met15Δ, ura3Δ, ho-, flo8-	Base strain used as parent for other strains in the study	Brachmann, CB, et al. Yeast. 1998.
yGAN100	pGAN202	-	BY4741	MATa, his3d1, leu2Δ, met15Δ, ura3Δ, ho-:yTRAP Swi1 sensor, flo8-	Non-flocculant, [swi-] strain. Control for FLO8 involvement. Used for growth curves and for out-cross ratio measurements.	This study
yGAN101	pGAN202	+	yGAN100	MATa, his3d1, leu2Δ, met15Δ, ura3Δ, ho-:yTRAP Swi1 sensor, flo8-	Non-flocculant [SWI+] strain. Control for FLO8 involvement. Used for growth curves and for out-cross ratio measurements.	This study
yGAN102	pGAN202, pGAN300	-	yGAN100	MATa, his3d1, leu2Δ, met15Δ, ura3Δ, ho-:yTRAP Swi1 sensor, FLO8:LEU2+	Flocculant [swi-] strain. Used for migration experiments and survivability experiments.	This study
yGAN103	pGAN202, pGAN300	+	yGAN102	MATa, his3d1, leu2Δ, met15Δ, ura3Δ, ho-:yTRAP Swi1 sensor, FLO8+:LEU2+	Flocculant [SWI+] strain. Used for migration experiments and survivability experiments.	This study
SK1		-		MATa/MATα, HO+	Parent HO+ strain used for out-cross ratio measurements. Sporulated and mated to yGAN100 and yGAN101.	Kane, SM and Roth R. J. Bacteriol. 1974.
BY4741		-		MATa, his3d1, leu2Δ, met15Δ, ura3Δ, trp1:KanMX ho-, flo8-	Exogenous strain used for out-cross ratio measurements.	Invitrogen Cat. no. 95401.H2
yGAN104	pGAN202	-	yGAN100, SK1	MATa/MATα,HO+/ho-:yTRAP Swi1 sensor, HIS3/his3d1, LEU2/leu2Δ, MET15/met15Δ, URA3/ura3Δ	[swi-] diploid strain used for out-cross ratio measurements.	This study
yGAN105	pGAN202	+	yGAN101, SK1	MATa/MATα, HO+/ho-:yTRAP Swi1 sensor, HIS3/his3d1, LEU2/leu2Δ, MET15/met15Δ, URA3/ura3Δ	[SWI+] diploid strain used for out-cross ratio measurements.	This study
yGAN106	pGAN202	-	yGAN101, SK1	MATa/MATα, HO+/ho-:yTRAP Swi1 sensor, HIS3/his3d1, LEU2/leu2Δ, MET15/met15Δ, URA3/ura3Δ	Cured [SWI+] (now [swi-]) diploid strain used for out-cross ratio measurements.	This study
